# Supplementary material for: A new luminescent Cd(ii)-MOF as a highly selective chemical probe for Fe3+ in aqueous solution with mixed metal ions
Source: Royal Society of Chemistry journal article supplement (doi:10.1039/c5ra18807e), 2015-01-01
Supplement: c5ra18807e1.pdf [file c5ra18807e1.pdf]

*Electronic Supplementary Information*

**New luminescent Cd(II)-MOF as highly selective chemical probe for Fe<sup>3+</sup> in aqueous solution with mixed metal ions**

**Yunlong Wu, Guo-Ping Yang\*, Yingdi Zhang, Nannan Shi, Jun Han and Yao-Yu Wang\***

*Key Laboratory of Synthetic and Natural Functional Molecule Chemistry of Ministry of Education, Shaanxi Key Laboratory of Physico-Inorganic Chemistry, College of Chemistry and Materials Science, Northwest University, Xi'an 710069, P.R. China. E-mail: [ygp@nwu.edu.cn](mailto:ygp@nwu.edu.cn); [wyaoyu@nwu.edu.cn](mailto:wyaoyu@nwu.edu.cn).*

**Table S1.** Selected bond lengths [ $\text{\AA}$ ] and angles [ $^\circ$ ] for complex **1**.

|                     |          |                     |          |
|---------------------|----------|---------------------|----------|
| Cd(1)-O(1)          | 2.201(5) | O(9)-Cd(1)-O(7)#2   | 111.0(2) |
| Cd(1)-O(2)#1        | 2.236(6) | O(1)-Cd(1)-O(5)     | 87.8(2)  |
| Cd(1)-O(9)          | 2.344(6) | O(2)#1-Cd(1)-O(5)   | 83.6(2)  |
| Cd(1)-O(7)#2        | 2.375(6) | O(9)-Cd(1)-O(5)     | 169.1(2) |
| Cd(1)-O(5)          | 2.399(6) | O(7)#2-Cd(1)-O(5)   | 79.2(2)  |
| Cd(1)-O(8)#2        | 2.446(6) | O(1)-Cd(1)-O(8)#2   | 155.6(2) |
| O(1)-Cd(1)-O(2)#1   | 99.9(2)  | O(2)#1-Cd(1)-O(8)#2 | 93.7(2)  |
| O(1)-Cd(1)-O(9)     | 83.1(2)  | O(9)-Cd(1)-O(8)#2   | 76.2(2)  |
| O(2)#1-Cd(1)-O(9)   | 92.1(2)  | O(7)#2-Cd(1)-O(8)#2 | 53.9(2)  |
| O(1)-Cd(1)-O(7)#2   | 125.1(2) | O(5)-Cd(1)-O(8)#2   | 113.9(2) |
| O(2)#1-Cd(1)-O(7)#2 | 130.5(2) |                     |          |

Symmetry codes: #1:  $x+1, y, z$ ; #2:  $-x+2, -y, -z+1$ ; #3:  $x-1, y, z$ ; #4:  $-x+1, -y, -z+2$ ; #5:  $-x+2, -y-1, -z+1$ .

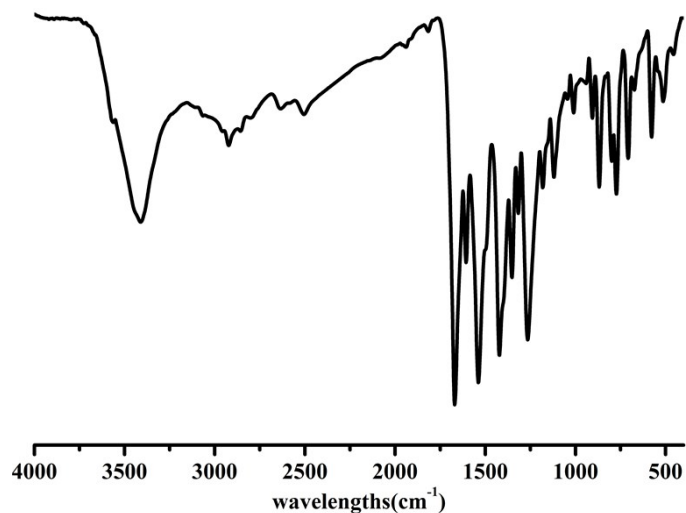

**Fig. S1** The FT-IR spectra of complex **1**.

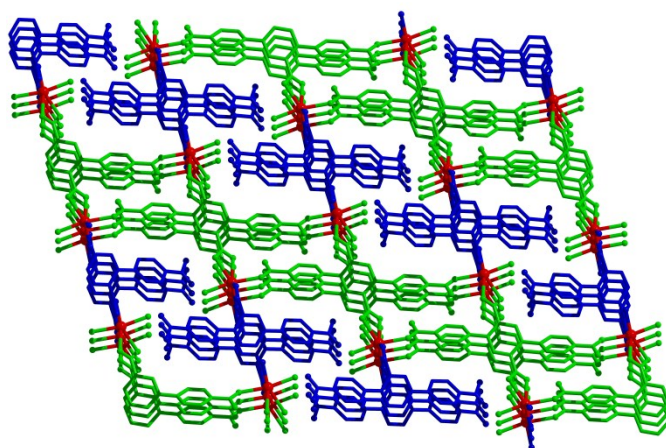

**Fig. S2** The 3D framework of **1**.

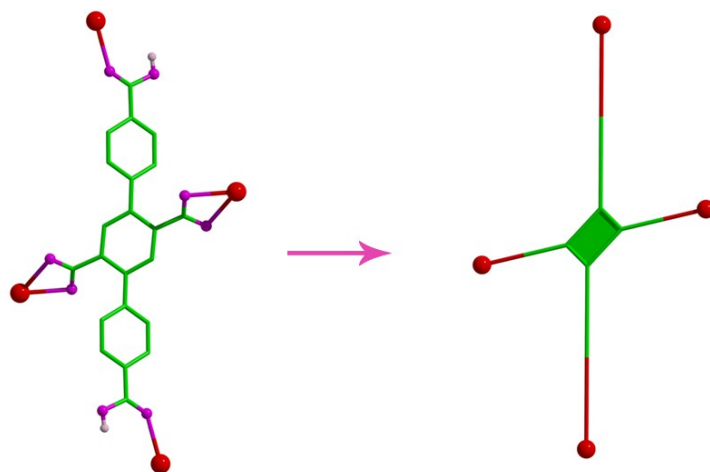

**(a)**

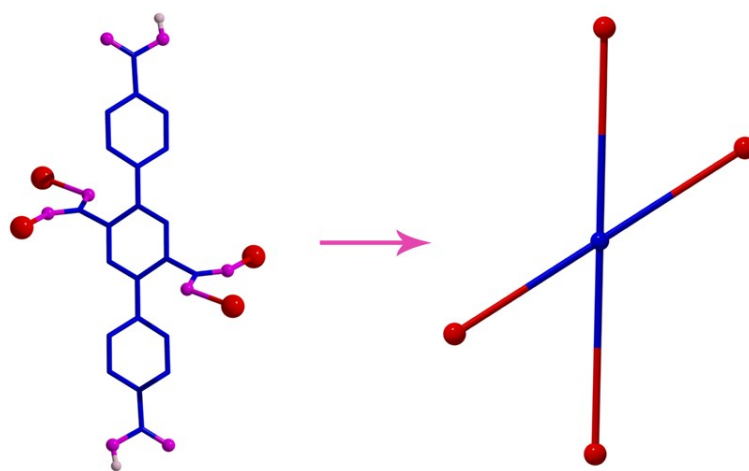

**(b)**

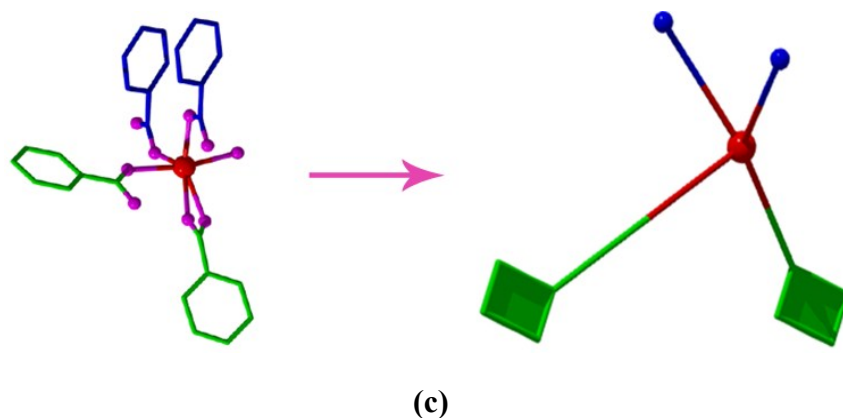

**Fig. S3** The ligands of  $H_2L_a^{2-}$  (a),  $H_2L_b^{2-}$  (b) and  $Cd(II)$  ions (c) simplified as four-connected nodes, respectively.

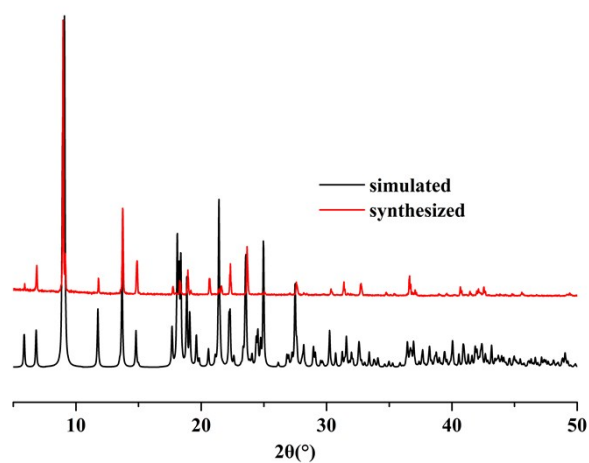

**Fig. S4** PXRD patterns of complex **1** simulated from the X-ray single-crystal data and as-synthesized products.

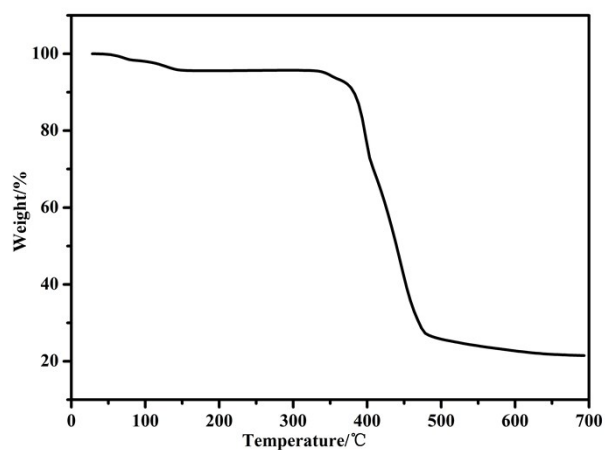

**Fig. S5** The TGA curve of complex **1**.

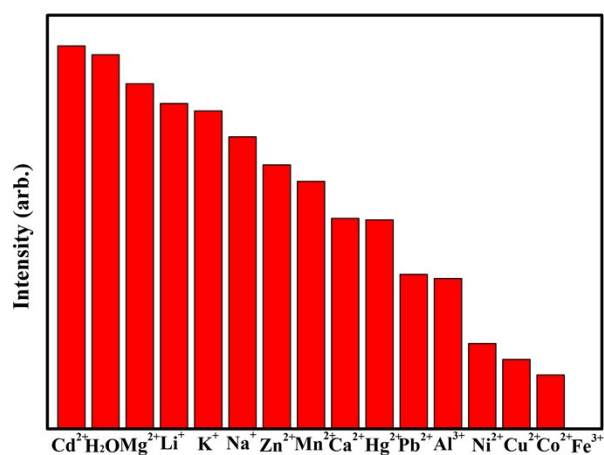

**Fig. S6** The comparison of the luminescent intensities with different metal ions in aqueous solution.

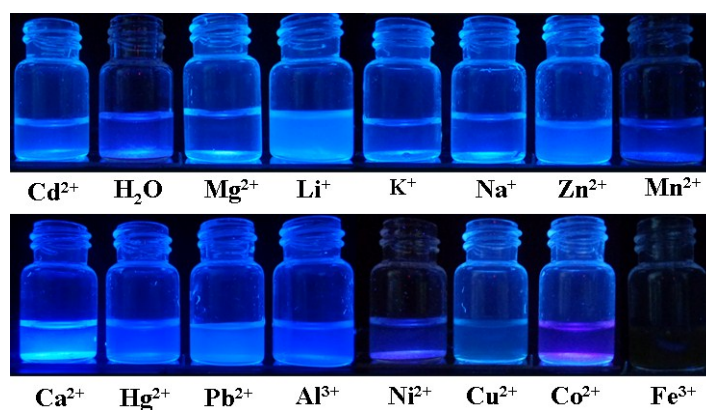

**Fig. S7** The visible color change of in aqueous solution containing the product of **1** and different metal ions.

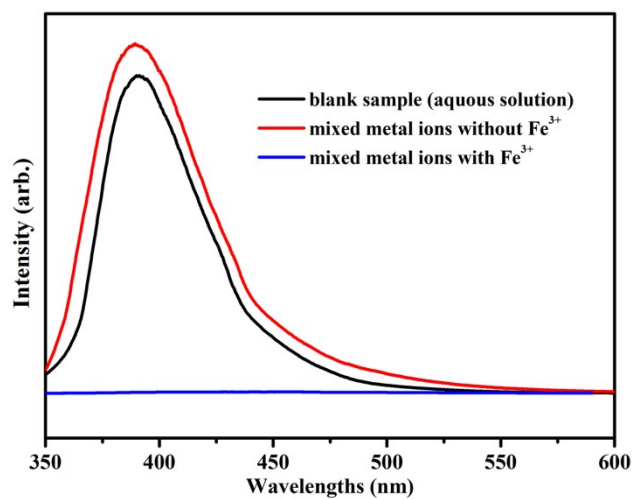

**Fig. S8** Emission spectra of **1** in aqueous solution with mixed metal ions.

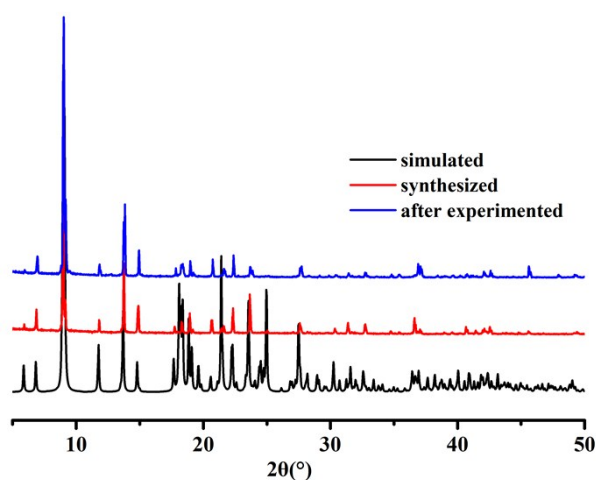

**Fig. S9** The PXRD patterns of complex **1** after series of sensing experiments.

| Sample                                                       | Concentration of $\text{Cd}^{2+}$ ( ug/mL) |
|--------------------------------------------------------------|--------------------------------------------|
| Blank sample ( $\text{H}_2\text{O}$ )                        | 0.1951                                     |
| Initial solution after immersing in $\text{H}_2\text{O}$     | 0.2035                                     |
| Final solution after sensing experiment for $\text{Fe}^{3+}$ | 0.1853                                     |

Linear equation:  $y = 0.02917x + 0.0019$  ( $y = \text{Abs}$ ;  $x = \text{Concentration}$ );  $R^2 = 0.9979$

**Fig. S10** ICP experiments of **1** after immersing in different solution (The concentration of complex **1** in solution for the ICP was 1000 ug/mL. The initial solution was the aqueous solution after **1** immersed for almost one week. And the final solution was the original solution after sensing experiment for  $\text{Fe}^{3+}$ , and the product of **1** was immersed for almost one month).
